# Supplementary material for: Machine Learning for COVID-19 Patient Management: Predictive Analytics and Decision Support
Source: bioRxiv or medRxiv preprint supplement (doi:10.1101/2024.02.26.24303208), 2024-02-28
Supplement: Supplementary file [file media-1.pdf]

| Variable Information   |          |       |                                           |                      |
|------------------------|----------|-------|-------------------------------------------|----------------------|
| Variable               | Position | Label | Domain                                    | Measurement Level    |
| AGE                    | Scale    | 2     | Age                                       | IDENTIFICATION       |
| CL_O2_NEED             | Ordinal  | 3     | O2 needs                                  | CLINICAL             |
| GENDER                 | Nominal  | 4     | Gender                                    | TREATMENT            |
| LB_CRP                 | Scale    | 5     | CRP                                       | BIOLOGY              |
| LB_D_DIMERS            | Scale    | 6     | D-dimers                                  | BIOLOGY              |
| LB_FERRITIN            | Scale    | 7     | Ferritin                                  | FILTERS FOR PROJECTS |
| LB_LDH                 | Scale    | 8     | LDH                                       | BIOLOGY              |
| LB_LYMPHOCYTES         | Scale    | 9     | Lymphocytes                               | ANALYSIS             |
| LB_PNN                 | Scale    | 10    | Neutrophils                               | BIOLOGY              |
| LB_PRO_CT              | Scale    | 11    | Procalcitonine                            | BIOLOGY              |
| LB_S_CREATININ         | Scale    | 12    | Serum Creatinin                           | BIOLOGY              |
| LB_WBC                 | Scale    | 13    | Leucocytes                                | RADIOLOGY            |
| MH_CRF                 | Nominal  | 14    | Chronic renal failure                     | MEDICAL HISTORY      |
| MH_CVD                 | Nominal  | 15    | Cardiovascular disease                    | MEDICAL HISTORY      |
| MH_DM                  | Nominal  | 16    | Diabetes mellitus                         | MEDICAL HISTORY      |
| MH_HTN                 | Nominal  | 17    | Hypertension                              | BASELINE             |
| MH_IS                  | Nominal  | 18    | Immunosupresion                           | MEDICAL HISTORY      |
| AH_LUNG_DISEASE_BINAR  | Nominal  | 19    | Lung Disease                              | BIOLOGY              |
| MH_SMOKER_BINARY       | Nominal  | 21    | Smoker                                    | Medical History      |
| MH_SYMPTOMATIC         | Nominal  | 22    | Symptomatic C19                           | Medical History      |
| MH_WEIGHT              | Scale    | 23    | Weight                                    | MEDICAL HISTORY      |
| RX_CT_GGO_PCT_BASE     | Scale    | 24    | Ground glass estimation (%) @ Baseline CT | BIOLOGY              |
| RX_CT_LOBAR_CDX_BASE   | Nominal  | 25    | Lobar condensation @ Baseline CT          | IDENTIFICATION       |
| IX_CT_PA_DIAMETER_BASI | Scale    | 26    | Pulmonary artery diameter @ Baseline CT   | RADIOLOGY            |
| SYMPTOME_DAY           | Scale    | 27    | Day symptoms started                      | BASELINE             |
| CT1_VALUE              | Scale    | 156   | 1st Ct value                              | BASELINE             |

FOR CLUSTERING

| Variable               | Position | Label | Domain                                            | Measurement Level |
|------------------------|----------|-------|---------------------------------------------------|-------------------|
| ATBG_BACTRIM           | Nominal  | 74    | Antibiogram-Bactrim                               | ANTIBIOGRAM       |
| ATBG_COLISTINE         | Nominal  | 77    | Antibiogram-colistine                             | ANTIBIOGRAM       |
| ATBG_MINOCYCLINE       | Nominal  | 76    | Antibiogram-Minocycline                           | ANTIBIOGRAM       |
| ATBG_QUINOLONE         | Nominal  | 75    | Antibiogram-quinolone                             | ANTIBIOGRAM       |
| TRT_TOCI_IL6           | Scale    | 121   | IL6 assay results                                 | BIOLOGY           |
| ICU_FILTER             | Nominal  | 86    | ICU admissions                                    | ICU PARAMETERS    |
| FIO2_HIGH              | Scale    | 136   | Highest FIO2                                      | ICU PARAMETERS    |
| OUT_HEMORRHAGE         | Nominal  | 53    | Hemorrhagic event                                 | ICU PARAMETERS    |
| OUT_ET                 | Nominal  | 55    | Intubation                                        | ICU PARAMETERS    |
| INTUBATION_DAY         | Scale    | 103   | Intubation Day                                    | ICU PARAMETERS    |
| EXTUBATION_DAY         | Scale    | 104   | Extubation Day                                    | ICU PARAMETERS    |
| OUT_ICU                | Nominal  | 54    | ICU Transfer                                      | ICU PARAMETERS    |
| PEEP_HIGH              | Scale    | 135   | Highest PEEP                                      | ICU PARAMETERS    |
| ICU_DAY                | Scale    | 101   | ICU transfer Day                                  | ICU PARAMETERS    |
| RX_CT_LOBAR_CDX_BASE   | Nominal  | 25    | Lobar condensation @ Baseline CT                  | IDENTIFICATION    |
| MH_IS_ADD              | Binary   | 154   | Immunosuppression                                 | INFECTION         |
| INF_NOSOCOMIAL_BINARY  | Nominal  | 95    | Infection nosocomiale                             | INFECTION         |
| PATHOGEN_PULMONARY     | Nominal  | 70    | Pulmonary pathogen                                | INFECTION         |
| THOGEN_EXTRA_PULMONA   | Nominal  | 71    | Extrapulmonary pathogen                           | INFECTION         |
| MH_OLP                 | Nominal  | 20    | Obstructive lung disease                          | MEDICAL HISTORY   |
| OUT_LOS                | Scale    | 127   | Length of Stay                                    | OUTCOME           |
| OUT_HEMORRHAGE_DAY     | Scale    | 129   | Day of Hemorrhagic event                          | OUTCOME           |
| OUT_COMPOSITE          | Nominal  | 94    | Composite Outcome (ICU, Intubation, Death)        | OUTCOME           |
| OUT_DEATH_BINARY       | Nominal  | 48    | All-cause mortality                               | OUTCOME           |
| OUT_PCFS_M0_BOOLEAN    | Nominal  | 49    | PCFS M0 binary                                    | OUTCOME           |
| OUT_PCFS_M2_BOOLEAN    | Nominal  | 50    | PCFS M2 binary                                    | OUTCOME           |
| ICU_STAY               | Scale    | 102   | ICU length of Stay                                | OUTCOME           |
| OUT_DEATH              | Nominal  | 47    | Mortality                                         | OUTCOME           |
| OUT_DISCHARGE_APP      | Nominal  | 56    | Discharge status                                  | OUTCOME           |
| OUT_DISCHARGE_PCSF     | Ordinal  | 98    | PCFS @ discharge                                  | OUTCOME           |
| OUT_MONTH2_APP         | Nominal  | 57    | 2-month post-discharge status                     | OUTCOME           |
| OUT_MONTH2_PCSF        | Ordinal  | 99    | PCFS @ 2-Month                                    | OUTCOME           |
| OUT_NEWS2              | Scale    | 126   | News 2 Score                                      | OUTCOME           |
| OUT_TEE                | Nominal  | 52    | Thromboembolic event                              | OUTCOME           |
| OUT_TEE_DAY            | Scale    | 128   | Day of Thromboembolic event                       | OUTCOME           |
| SOFA                   | Scale    | 140   | SOFA                                              | OUTCOME           |
| APACHE                 | Scale    | 141   | APACHE                                            | OUTCOME           |
| MH_HF                  | Nominal  | 157   | Heart failure                                     | OUTCOME           |
| WHO_SCORE              | Ordinal  | 100   | WHO Score                                         | OUTCOME           |
| DELTA_CT_DAYS          | Scale    | 130   | n (won't consider mean of velocity but ratio of n | RADIOLOGY         |
| DELTA_GGO_PCT          | Scale    | 132   | Variation of GGO (si >0 = bad)                    | RADIOLOGY         |
| DELTA_PA_DIAMETER      | Scale    | 131   | Variation of PA diameter (mm) (si >0 = bad)       | RADIOLOGY         |
| RX_CT_PNEUMO_MED_ALL   | Nominal  | 87    | eummediastinum (initial CT and/or Follow-up (     | RADIOLOGY         |
| IX_CT_LOBAR_CDX_1ST_FL | Nominal  | 43    | Lobar condensation @ 1st Follow-up                | RADIOLOGY         |
| TRT_IVM_DAY            | Scale    | 109   | Ivermectine start day                             | TREATMENT         |
| TRT_HCQ_DAY            | Scale    | 105   | Hydroxychloroquine start day                      | TREATMENT         |
| OUT_DV                 | Nominal  | 51    | Ventral Decubitus                                 | TREATMENT         |
| HUMID                  | Nominal  | 66    | Humid                                             | TREATMENT         |
| TRT_AC                 | Nominal  | 31    | Anticoagulants                                    | TREATMENT         |
| TRT_AP                 | Nominal  | 32    | Antiplatelets                                     | TREATMENT         |
| TRT_ASA                | Nominal  | 30    | pirin (0 = no, 1 = ~81mg, 2 = ~162mg, 3 = ~324r   | TREATMENT         |
| TRT_ATB_1              | Nominal  | 36    | Penicillin                                        | TREATMENT         |
| TRT_ATB_2              | Nominal  | 37    | Cephalosporin                                     | TREATMENT         |
| TRT_ATB_3              | Nominal  | 38    | Carbapenem                                        | TREATMENT         |
| TRT_ATB_4              | Nominal  | 39    | Aminosid                                          | TREATMENT         |
| TRT_ATB_5              | Nominal  | 40    | Quinolone                                         | TREATMENT         |
| TRT_ATB_6              | Nominal  | 41    | Glycopeptide                                      | TREATMENT         |
| TRT_ATB_7              | Nominal  | 42    | Bactrim                                           | TREATMENT         |
| TRT_ATB_ASSOCIATION    | Nominal  | 34    | Antibiotics association                           | TREATMENT         |
| TRT_ATB_DAY            | Scale    | 123   | Antibiotics start day                             | TREATMENT         |
| TRT_ATB_FAMILY         | Nominal  | 35    | Antibiotics class                                 | TREATMENT         |
| TRT_ATB_SCOPE          | Nominal  | 33    | Antibiotics scope                                 | TREATMENT         |
| TRT_AZT                | Nominal  | 59    | Azithromycine                                     | TREATMENT         |
| TRT_AZT_DAY            | Scale    | 107   | Azithromycine start day                           | TREATMENT         |
| TRT_AZT_DURATION       | Scale    | 108   | Azithromycine duration                            | TREATMENT         |
| TRT_BIOTHERAPY         | Nominal  | 88    | Biotherapy (Baricitinib or tocilizumab)           | TREATMENT         |
| TRT_BARI               | Nominal  | 64    | Baricitinib                                       | TREATMENT         |
| TRT_BARI_DAY           | Scale    | 118   | Baricitinib start day                             | TREATMENT         |
| TRT_BARI_DURATION      | Scale    | 119   | Baricitinib duration                              | TREATMENT         |
| TRT_TOCI               | Nominal  | 65    | Tocilizumab                                       | TREATMENT         |
| TRT_TOCI_CURES         | Nominal  | 29    | Tocilizumab number of cures                       | TREATMENT         |
| TRT_TOCI_DAY           | Scale    | 120   | Tocilizumab start day                             | TREATMENT         |
| TRT_TOCI_DOSE          | Scale    | 122   | Tocilizumab dose                                  | TREATMENT         |
| TRT_TOCI_TIMING        | Nominal  | 90    | Tocilizumab Timing (0 = day 1, 1 = day2+)         | TREATMENT         |
| TRT_GC                 | Nominal  | 63    | Glucocorticoids                                   | TREATMENT         |
| TRT_GC_DAY             | Scale    | 115   | Corticoids start day                              | TREATMENT         |
| TRT_GC_DURATION        | Scale    | 117   | Corticoids duration                               | TREATMENT         |
| TRT_GC_MAX             | Scale    | 116   | Corticoids Maximal dose                           | TREATMENT         |
| TRT_HCQ                | Nominal  | 58    | Hydroxychloroquine                                | TREATMENT         |
| TRT_HCQ_DURATION       | Scale    | 106   | Hydroxychloroquine duration                       | TREATMENT         |
| TRT_IVM                | Nominal  | 60    | Ivermectine                                       | TREATMENT         |
| TRT_IVM_DURATION       | Scale    | 110   | Ivermectine duration                              | TREATMENT         |
| TRT_L_R                | Nominal  | 61    | Lopinavir/Ritonavir                               | TREATMENT         |
| TRT_L_R_DAY            | Scale    | 111   | Lopinavir/ritonavir start day                     | TREATMENT         |
| TRT_L_R_DURATION       | Scale    | 112   | Lopinavir/ritonavir duration                      | TREATMENT         |
| TRT_RMS                | Nominal  | 62    | Remsidivir                                        | TREATMENT         |
| TRT_RMS_DAY            | Scale    | 113   | Remsidivir start day                              | TREATMENT         |
| TRT_RMS_DURATION       | Scale    | 114   | Remsidivir duration                               | TREATMENT         |

POST CLUSTERING

POST CLUSTERING

POST CLUSTERING

surv3 = survival analysis where population is every ICU patient, deaths = dead, censored = survived ICU (i.e. discharged from ICU)

### Group 1

| ICU/PCT | >= 0.1 | <0.1 |
|---------|--------|------|
| 0       | 26     | 158  |
| 1       | 4      | 19   |

  

|                  |     |
|------------------|-----|
| ICU 1/PCT >= 0.5 | 207 |
|                  | n/o |

  

|                 |     |
|-----------------|-----|
| ICU 1/PCT < 0.5 | n/o |
|-----------------|-----|

### Group 2

| ICU/PCT | >= 0.1 | <0.1 |
|---------|--------|------|
| 0       | 32     | 64   |
| 1       | 19     | 22   |

  

|                  |     |
|------------------|-----|
| ICU 1/PCT >= 0.5 | 137 |
|                  | n/o |

  

|                 |     |
|-----------------|-----|
| ICU 1/PCT < 0.5 | n/o |
|-----------------|-----|

### Group 3

| ICU/PCT | >= 0.1 | <0.1 |
|---------|--------|------|
| 0       | 17     | 75   |
| 1       | 11     | 43   |

  

|                  |     |
|------------------|-----|
| ICU 1/PCT >= 0.5 | 146 |
|                  | n/o |

| ICU 1/PCT < 0.5  | coef       | exp_coef | 2.5   | 97.5      | p_value   |
|------------------|------------|----------|-------|-----------|-----------|
| TRT_GC_DURATION  | -5.2273521 | 0.005    | 0.000 | 0.240     | 7.04.E-03 |
| TRT_ATB_3_yes    | 5.5046977  | 245.844  | 3.932 | 15370.350 | 9.08.E-03 |
| TRT_AZT_DAY      | 4.7441118  | 114.906  | 3.138 | 4206.902  | 9.81.E-03 |
| TRT_TOCI_CURES_1 | -0.5276876 | 0.590    | 0.090 | 3.881     | 5.83.E-01 |
| TRT_TOCI_CURES_2 | 5.0569302  | 157.107  | 2.641 | 9347.530  | 1.53.E-02 |

surv2 = survival analysis where population is only the living, deaths = discharged, no censored

### Group 1

| ICU/PCT | >= 0.5 | <0.5 |
|---------|--------|------|
| 0       | 26     | 158  |
| 1       | 4      | 19   |

207

| ICU 0/PCT >= 0.5 | coef       | exp_coef    | 2.5   | 97.5  | p_value   |
|------------------|------------|-------------|-------|-------|-----------|
| TRT_GC_DURATION  | -2.181689  | 0.113       | 0.034 | 0.370 | 3.14.E-04 |
| TRT_ATB_4_yes    | -2.69712   | 0.067       | 0.006 | 0.708 | 2.46.E-02 |
| TRT_AZT_DAY      | -1.77009   | 0.170       | 0.049 | 0.589 | 5.16.E-03 |
| TRT_ATB_7_yes    | -22.559509 | 1.59415E-10 | 0     | Inf   | 9.98.E-01 |

ICU 1/PCT >= 0.5

| ICU 0/PCT < 0.5 | coef       | exp_coef | 2.5   | 97.5  | p_value   |
|-----------------|------------|----------|-------|-------|-----------|
| TRT_ATB_3_yes   | -1.3393841 | 0.262    | 0.124 | 0.553 | 4.44.E-04 |
| TRT_TOCI_DOSE   | 0.9014159  | 2.463    | 1.181 | 5.136 | 1.62.E-02 |

ICU 1/PCT < 0.5

### Group 2

| ICU/PCT | >= 0.5 | <0.5 |
|---------|--------|------|
| 0       | 32     | 64   |
| 1       | 19     | 22   |

137

| ICU 0/PCT >= 0.5 | coef   | exp_coef | 2.5   | 97.5  | p_value   |
|------------------|--------|----------|-------|-------|-----------|
| CL_O2_NEED_1     | 0.489  | 1.631    | 0.482 | 5.524 | 4.32.E-01 |
| CL_O2_NEED_2     | -3.599 | 0.027    | 0.003 | 0.285 | 2.60.E-03 |
| TRT_IVM_DURATION | 0.599  | 1.820    | 0.985 | 3.360 | 5.57.E-02 |

ICU 1/PCT >= 0.5

| ICU 0/PCT < 0.5 | coef       | exp_coef | 2.5   | 97.5  | p_value   |
|-----------------|------------|----------|-------|-------|-----------|
| TRT_ATB_6_yes   | -1.248932  | 0.287    | 0.102 | 0.807 | 1.79.E-02 |
| TRT_ATB_DAY     | 0.5196893  | 1.682    | 1.090 | 2.595 | 1.89.E-02 |
| TRT_GC_DURATION | -0.4540597 | 0.635    | 0.428 | 0.942 | 2.38.E-02 |

ICU 1/PCT < 0.5

### Group 3

| ICU/PCT | >= 0.5 | <0.5 |
|---------|--------|------|
| 0       | 17     | 75   |
| 1       | 11     | 43   |

146

ICU 0/PCT >= 0.5

ICU 1/PCT >= 0.5

| ICU 0/PCT < 0.5 | coef       | exp_coef | 2.5   | 97.5   | p_value   |
|-----------------|------------|----------|-------|--------|-----------|
| TRT_GC_DURATION | -0.6507376 | 0.522    | 0.348 | 0.783  | 1.68.E-03 |
| TRT_GC_MAX      | -0.4088704 | 0.664    | 0.483 | 0.915  | 1.22.E-02 |
| OUT_DV_yes      | 0.7418228  | 2.100    | 1.221 | 3.611  | 7.34.E-03 |
| TRT_DOXY_yes    | 2.0819768  | 8.020    | 2.165 | 29.714 | 1.83.E-03 |

| ICU 1/PCT < 0.5                   | coef   | exp_coef | 2.5   | 97.5  | p_value   |
|-----------------------------------|--------|----------|-------|-------|-----------|
| TRT_GC_DURATION                   | -1.202 | 0.300    | 0.160 | 0.563 | 1.75.E-04 |
| TRT_ATB_1_yes                     | -1.773 | 0.170    | 0.054 | 0.535 | 2.47.E-03 |
| TRT_TOCI_DAY                      | -1.397 | 0.247    | 0.090 | 0.682 | 6.94.E-03 |
| PATHOGEN_PULMONA<br>RY_BINARY_yes | -1.406 | 0.245    | 0.073 | 0.820 | 2.25.E-02 |

surv1 = survival analysis where population is everyone (deceased and living), deaths = cf. "formula"

### Group 1

| ICU/PCT | >= 0.5 | <0.5 |
|---------|--------|------|
| 0       | 26     | 158  |
| 1       | 4      | 19   |
| 207     |        |      |

ICU 0/PCT >= 0.5 n/o

ICU 1/PCT >= 0.5 n/o

ICU 0/PCT < 0.5 n/o

ICU 1/PCT < 0.5 n/o

### Group 2

| ICU/PCT | >= 0.5 | Column1 |
|---------|--------|---------|
| 0       | 32     | 64      |
| 1       | 19     | 22      |
| 137     |        |         |

ICU 0/PCT >= 0.5 n/o

ICU 1/PCT >= 0.5 formula

| Surv(INTUBATION_DAY, OUT_ET)  | coef    | exp_coef | 2.5   | 97.5     | p_value   |
|-------------------------------|---------|----------|-------|----------|-----------|
| PATHOGEN_PULMONARY_BINARY_yes | 4.211   | 67.404   | 1.613 | 2816.268 | 2.70.E-02 |
| TRT_ATB_4_yes                 | -21.758 | 0.000    | 0.000 | Inf      | 9.99.E-01 |
| TRT_GC_MAX                    | -2.218  | 0.109    | 0.006 | 1.847    | 1.25.E-01 |

ICU 0/PCT < 0.5 formula

| Surv(OUT_HEMORRHAGE_DAY, OUT_HEMORRHAGE) | coef  | exp_coef | 2.5   | 97.5   | p_value   |
|------------------------------------------|-------|----------|-------|--------|-----------|
| TRT_ATB_6_yes                            | 2.267 | 9.654    | 1.609 | 57.937 | 1.31.E-02 |

formula

| Surv(INTUBATION_DAY, OUT_ET) | coef   | exp_coef | 2.5   | 97.5  | p_value   |
|------------------------------|--------|----------|-------|-------|-----------|
| TRT_ATB_DAY                  | -1.072 | 0.342    | 0.143 | 0.822 | 1.64.E-02 |

ICU 1/PCT < 0.5 formula

| Surv(ICU_DAY, ICU_FILTER) | coef    | exp_coef | 2.5   | 97.5   | p_value   |
|---------------------------|---------|----------|-------|--------|-----------|
| TRT_TOCI_DAY              | -1.411  | 0.244    | 0.075 | 0.793  | 1.90.E-02 |
| TRT_GC_DAY                | -1.894  | 0.150    | 0.043 | 0.525  | 2.98.E-03 |
| TRT_ASA_1                 | 1.038   | 2.823    | 0.648 | 12.297 | 1.67.E-01 |
| TRT_ASA_3                 | 2.042   | 7.704    | 1.100 | 53.971 | 3.98.E-02 |
| TRT_HCO_DURATION          | -19.868 | 0        | 0.000 | 0.042  | 1.97.E-02 |

### Group 3

| ICU/PCT | >= 0.5 | Column1 |
|---------|--------|---------|
| 0       | 17     | 75      |
| 1       | 11     | 43      |
| 146     |        |         |

ICU 0/PCT >= 0.5

ICU 1/PCT >= 0.5

ICU 0/PCT < 0.5 formula

| Surv(OUT_LOS, OUT_DEATH_BINARY) | coef      | exp_coef | 2.5   | 97.5    | p_value   |
|---------------------------------|-----------|----------|-------|---------|-----------|
| TRT_GC_DURATION                 | -6.890311 | 0.001    | 0.000 | 1.051   | 5.17.E-02 |
| TRT_AP_yes                      | 3.301662  | 27.158   | 1.914 | 385.400 | 1.47.E-02 |

ICU 1/PCT < 0.5 formula

| Surv(ICU_DAY, ICU_FILTER)     | coef   | exp_coef | 2.5   | 97.5    | p_value   |
|-------------------------------|--------|----------|-------|---------|-----------|
| TRT_TOCI_CURES_2              | -8.296 | 0.000    | 0.000 | 0.006   | 2.10.E-07 |
| TRT_TOCI_CURES_1              | -3.310 | 0.037    | 0.004 | 0.354   | 4.31.E-03 |
| TRT_GC_DAY                    | -1.724 | 0.178    | 0.074 | 0.427   | 1.10.E-04 |
| TRT_ATB_6_yes                 | -1.489 | 0.226    | 0.088 | 0.576   | 1.86.E-03 |
| TRT_ATB_DAY                   | -1.373 | 0.253    | 0.128 | 0.502   | 8.21.E-05 |
| TRT_BARI_DURATION             | -1.308 | 0.270    | 0.092 | 0.797   | 1.77.E-02 |
| TRT_ATB_7_yes                 | -1.206 | 0.299    | 0.098 | 0.916   | 3.45.E-02 |
| TRT_RMS_DURATION              | -1.136 | 0.321    | 0.095 | 1.087   | 6.79.E-02 |
| TRT_ATB_2_yes                 | 1.607  | 4.988    | 1.986 | 12.524  | 6.24.E-04 |
| PATHOGEN_PULMONARY_BINARY_yes | 3.176  | 23.947   | 7.322 | 78.321  | 1.50.E-07 |
| TRT_TOCI_TIMING_yes           | 3.316  | 27.556   | 3.054 | 248.607 | 3.13.E-03 |

### Group 1

| ICU/PCT    | >= 0.5 | <0.5 |
|------------|--------|------|
| 0          | 26     | 158  |
| 1          | 4      | 19   |
| <b>207</b> |        |      |

|                  |                                        |            |
|------------------|----------------------------------------|------------|
| ICU 0/PCT >= 0.5 | INF_NOSOCOMIAL_BINARY<br>OUT_COMPOSITE | n/o<br>n/o |
| ICU 1/PCT >= 0.5 | INF_NOSOCOMIAL_BINARY<br>OUT_COMPOSITE | n/o<br>n/o |
| ICU 0/PCT < 0.5  | INF_NOSOCOMIAL_BINARY<br>OUT_COMPOSITE | n/o<br>n/o |
| ICU 1/PCT < 0.5  | INF_NOSOCOMIAL_BINARY<br>OUT_COMPOSITE | n/o<br>n/o |

### Group 2

| ICU/PCT    | >= 0.5 | <0.5 |
|------------|--------|------|
| 0          | 32     | 64   |
| 1          | 19     | 22   |
| <b>137</b> |        |      |

|                  |                                                                                                                    |                                                                   |
|------------------|--------------------------------------------------------------------------------------------------------------------|-------------------------------------------------------------------|
| ICU 0/PCT >= 0.5 | INF_NOSOCOMIAL_BINARY<br>OUT_COMPOSITE                                                                             | n/o<br>n/o                                                        |
| ICU 1/PCT >= 0.5 | INF_NOSOCOMIAL_BINARY<br><b>OUT_COMPOSITE</b><br>(Intercept)<br>TRT_ATB_4_yes<br>TRT_GC_DURATION                   | n/o<br><b>OR</b><br>0.220<br>inf<br>0.174                         |
|                  |                                                                                                                    | <b>2.50%</b><br>0.054<br>0.000<br>0.015                           |
|                  |                                                                                                                    | <b>97.50%</b><br>0.619<br>NA<br>1.027                             |
|                  |                                                                                                                    | <b>pvalue</b><br>1.25.E-02<br>9.95.E-01<br>1.18.E-01              |
| ICU 0/PCT < 0.5  | INF_NOSOCOMIAL_BINARY<br><b>OUT_COMPOSITE</b><br>(Intercept)<br>TRT_ATB_4_yes<br>TRT_AZT_DURATION<br>TRT_ATB_2_yes | n/o<br><b>OR</b><br>0.207<br>inf<br>inf<br>8.056                  |
|                  |                                                                                                                    | <b>2.50%</b><br>0.078<br>0.000<br>0.000<br>1.571                  |
|                  |                                                                                                                    | <b>97.50%</b><br>0.465<br>inf<br>NA<br>49.226                     |
|                  |                                                                                                                    | <b>pvalue</b><br>4.43.E-04<br>9.99.E-01<br>9.92.E-01<br>1.49.E-02 |
| ICU 1/PCT < 0.5  | INF_NOSOCOMIAL_BINARY<br>OUT_COMPOSITE                                                                             | n/o<br>n/o                                                        |

### Group 3

| ICU/PCT    | >= 0.5 | <0.5 |
|------------|--------|------|
| 0          | 17     | 75   |
| 1          | 11     | 43   |
| <b>146</b> |        |      |

|                  |                                        |            |
|------------------|----------------------------------------|------------|
| ICU 0/PCT >= 0.5 | INF_NOSOCOMIAL_BINARY<br>OUT_COMPOSITE | n/o<br>n/o |
| ICU 1/PCT >= 0.5 | INF_NOSOCOMIAL_BINARY<br>OUT_COMPOSITE | n/o<br>n/o |
| ICU 0/PCT < 0.5  | INF_NOSOCOMIAL_BINARY<br>OUT_COMPOSITE | n/o<br>n/o |
| ICU 1/PCT < 0.5  | INF_NOSOCOMIAL_BINARY<br>OUT_COMPOSITE | n/o<br>n/o |
